# Supplementary material for: GenomicSuperSignature facilitates interpretation of RNA-seq experiments through robust, efficient comparison to public databases
Source: PubMed Central journal article supplement (PMC9237024; doi:10.1038/s41467-022-31411-3), 2022-06-27

PC distribution in 1–element RAVs

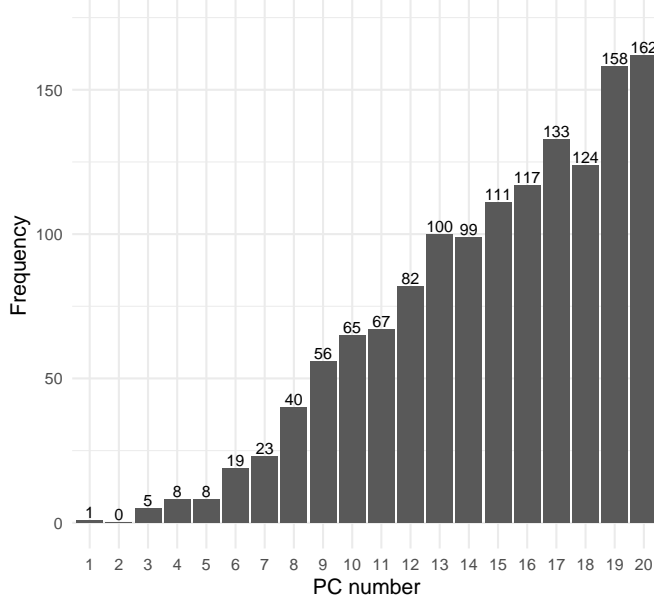

PC distribution in 2–element RAVs

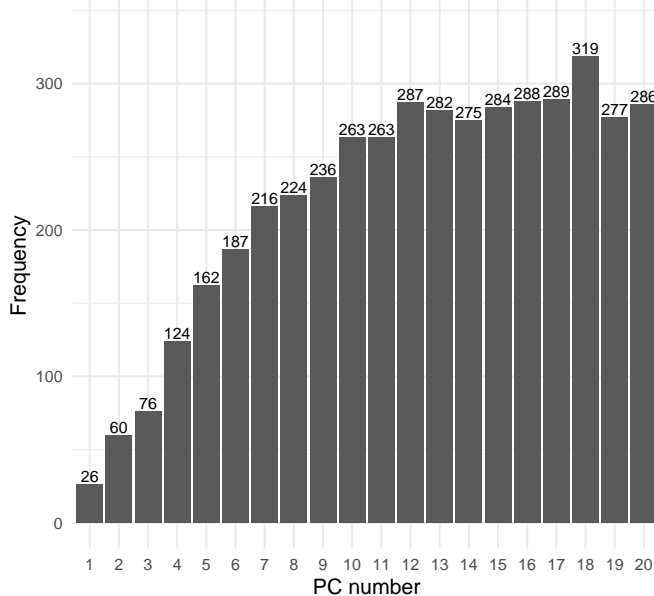

PC distribution in 3–element RAVs

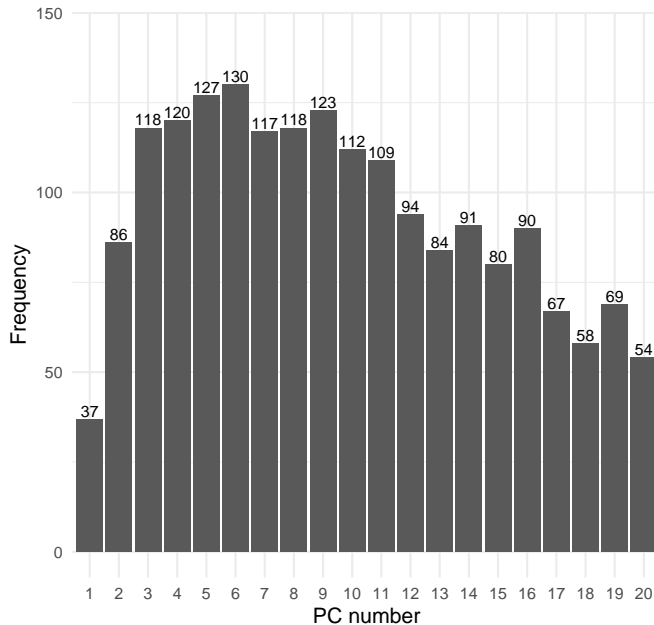

PC distribution in 4–element RAVs

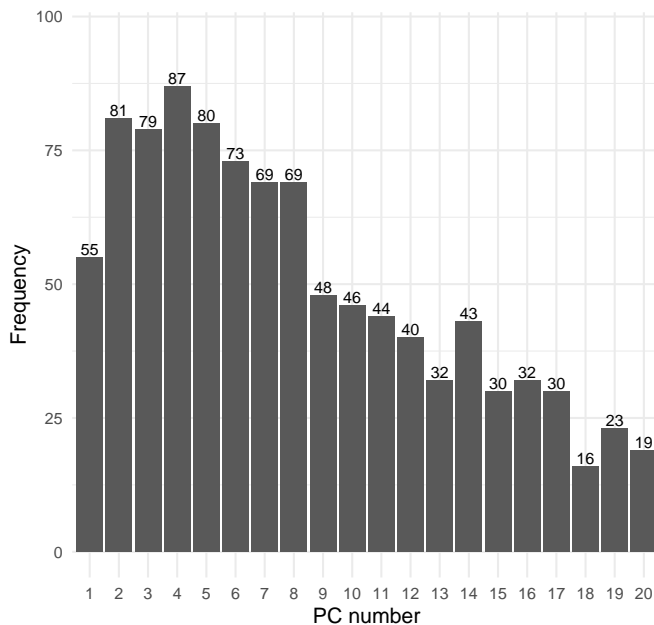

PC distribution in 5-element RAVs

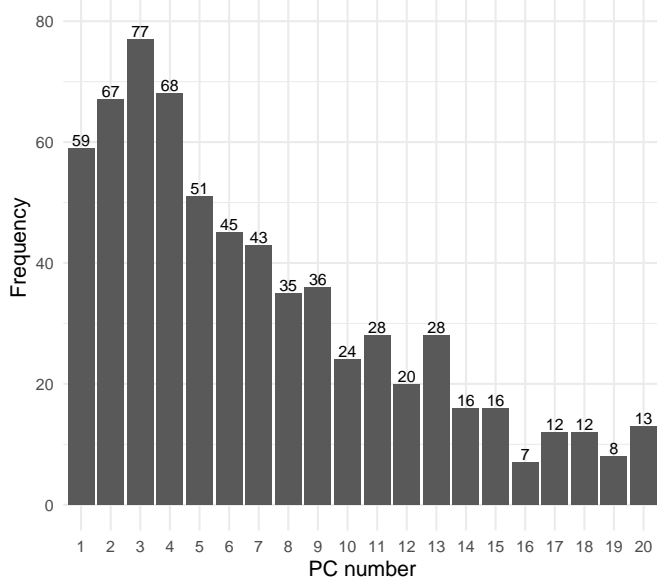

PC distribution in 6-element RAVs

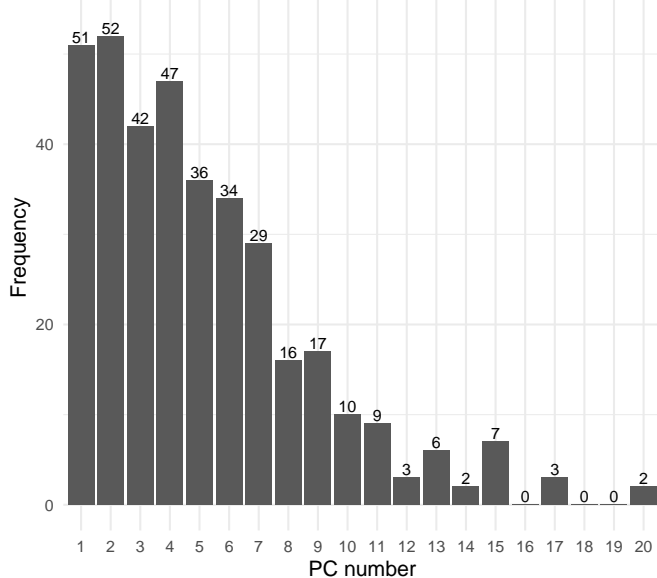

PC distribution in 7-element RAVs

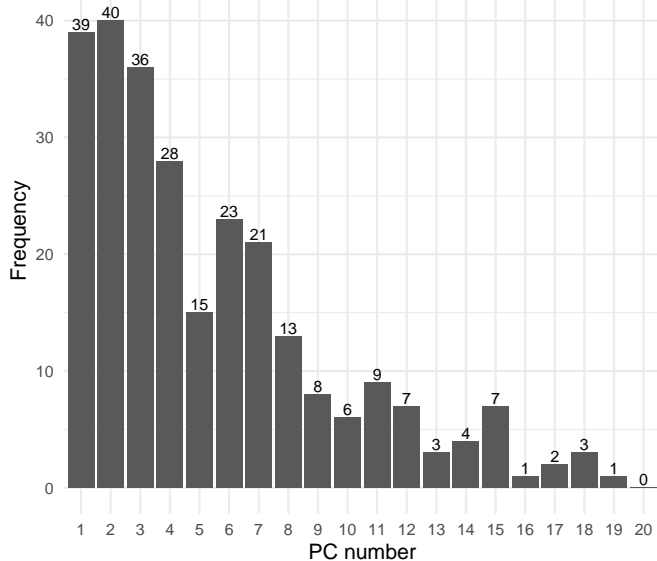

PC distribution in 8-element RAVs

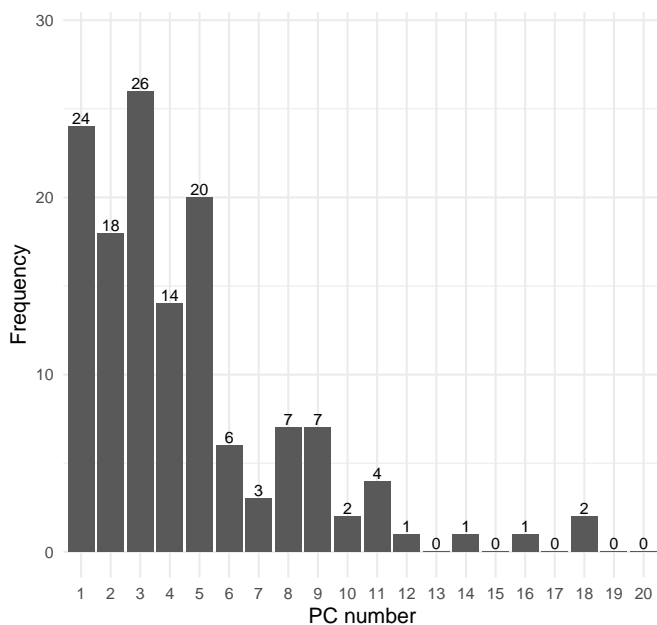

PC distribution in 9–element RAVs

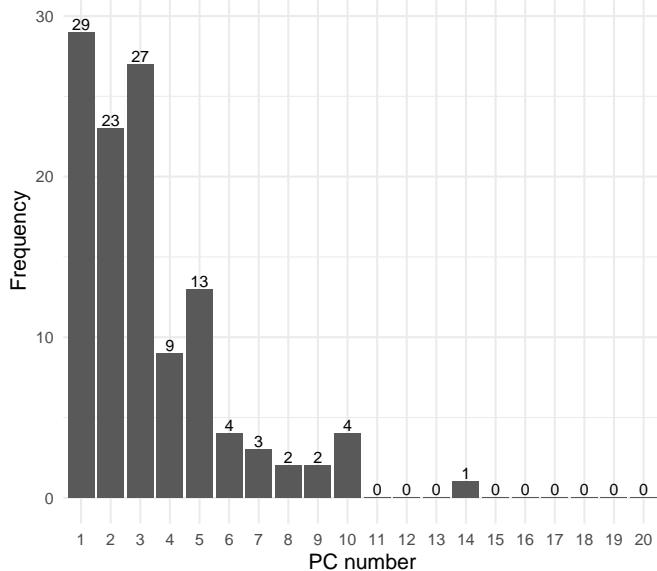

PC distribution in 10–element RAVs

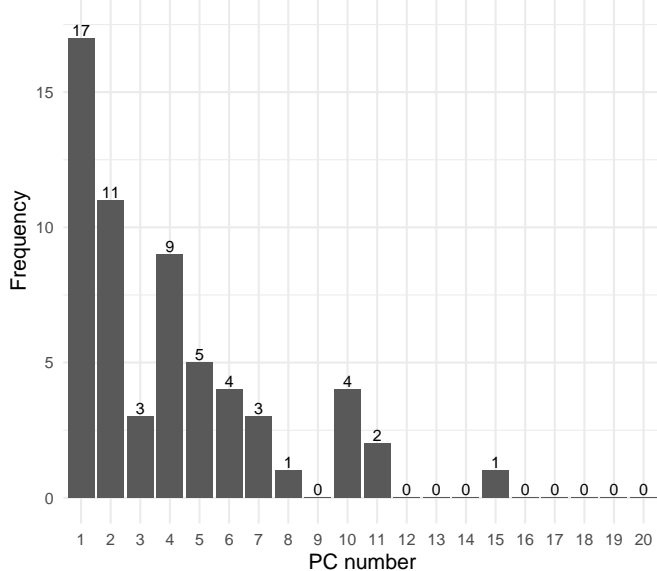

PC distribution in 11–element RAVs

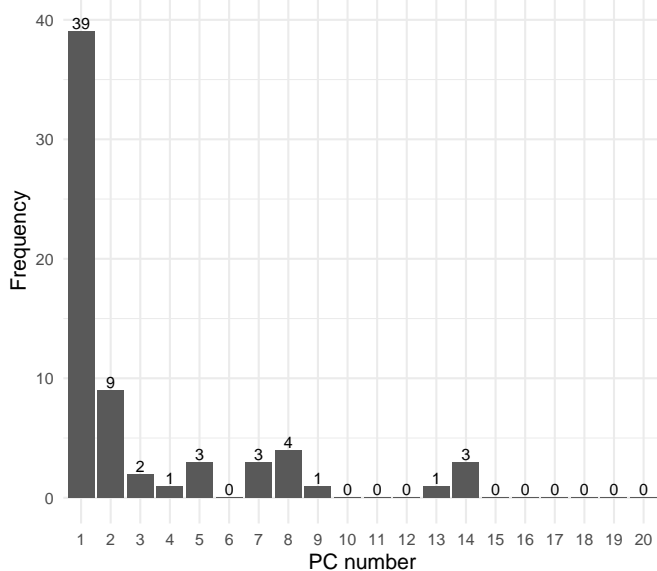

PC distribution in 12–element RAVs

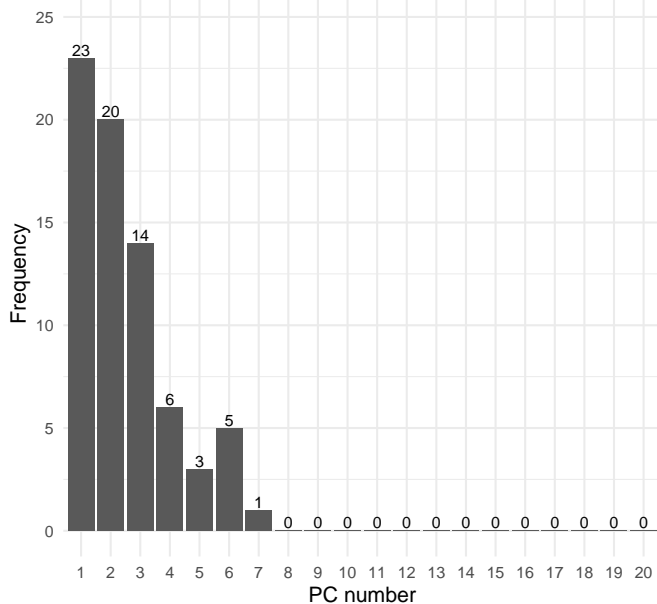

PC distribution in 13–element RAVs

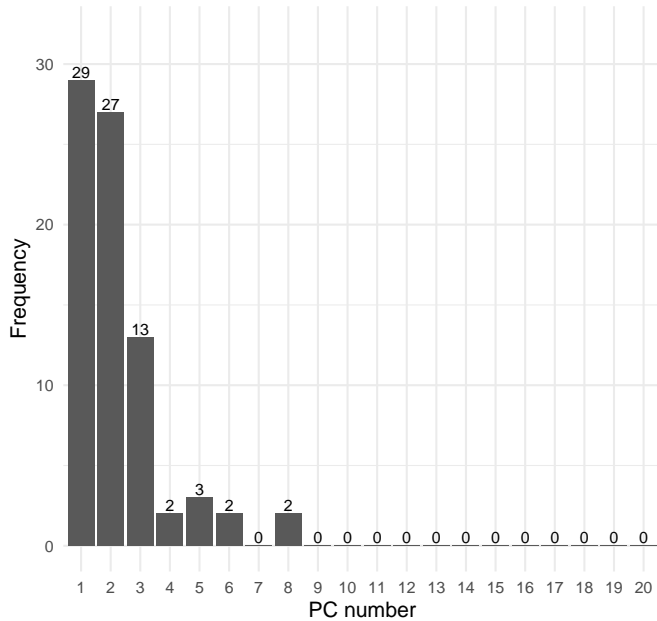

PC distribution in 14–element RAVs

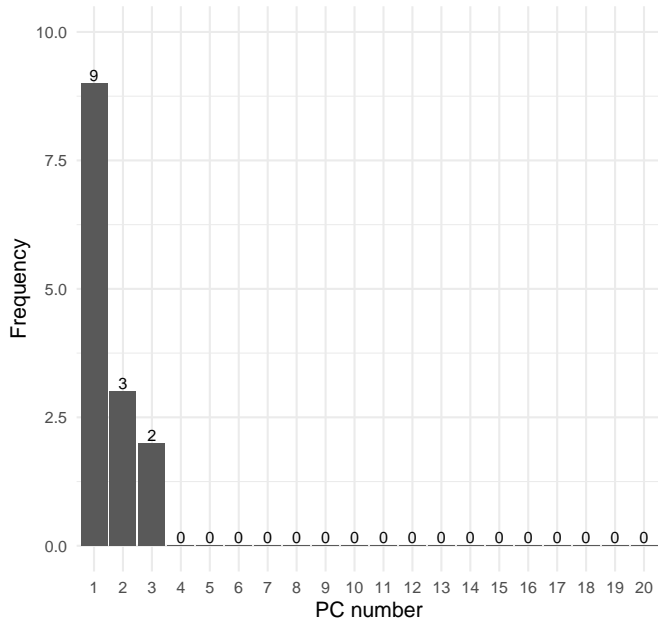

PC distribution in 15–element RAVs

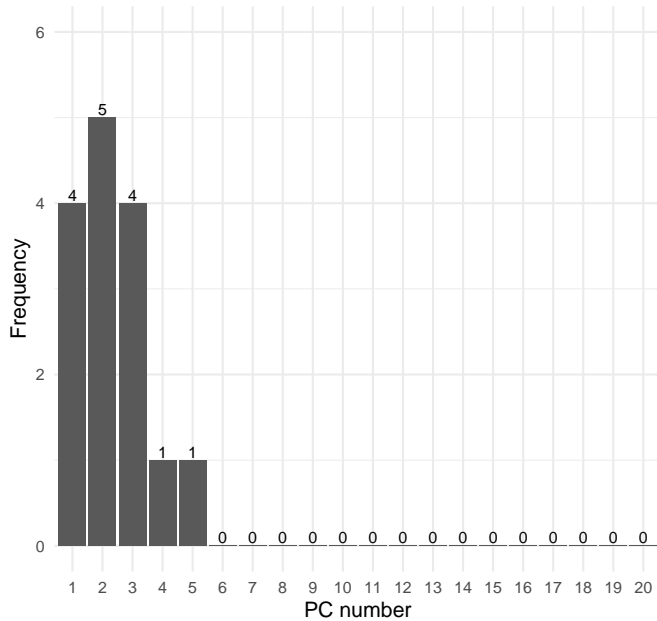

PC distribution in 17–element RAVs

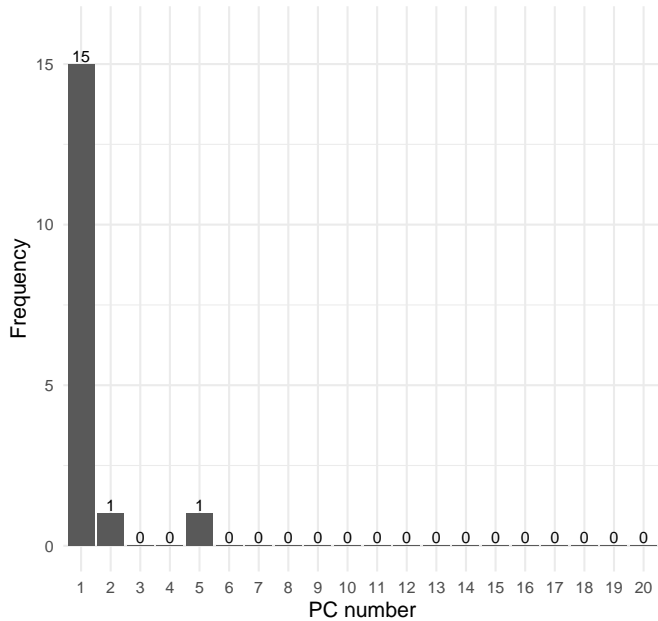

PC distribution in 19-element RAVs

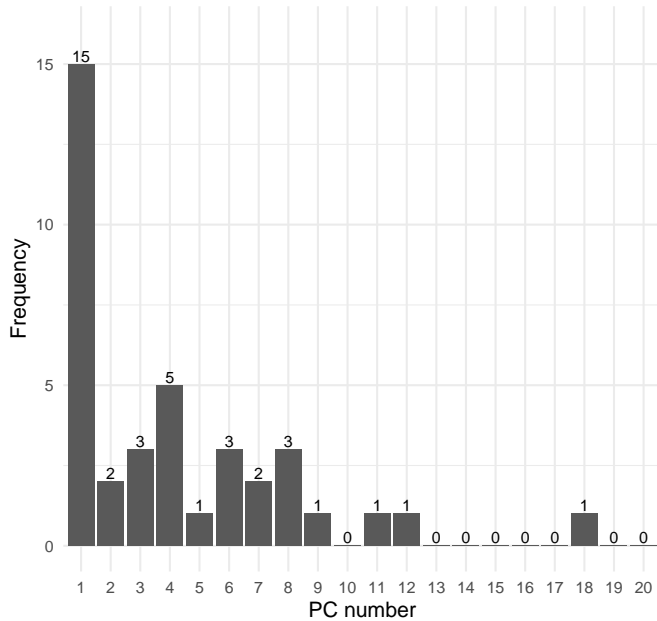

PC distribution in 20-element RAVs

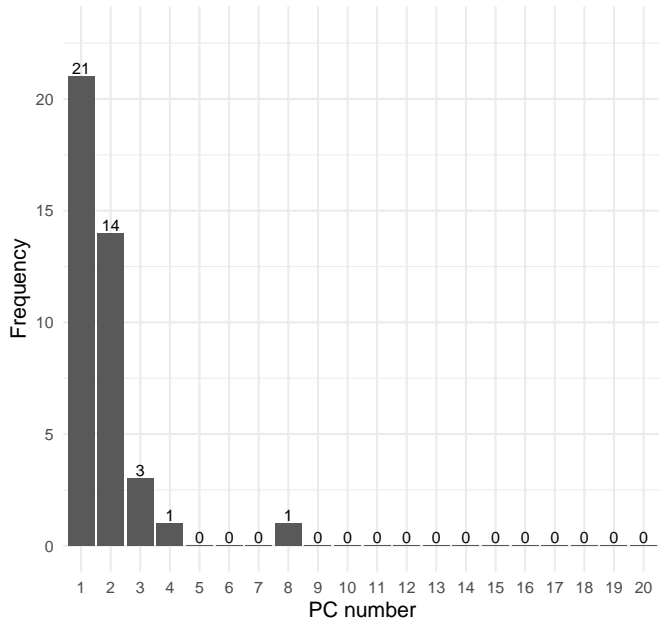

PC distribution in 21-element RAVs

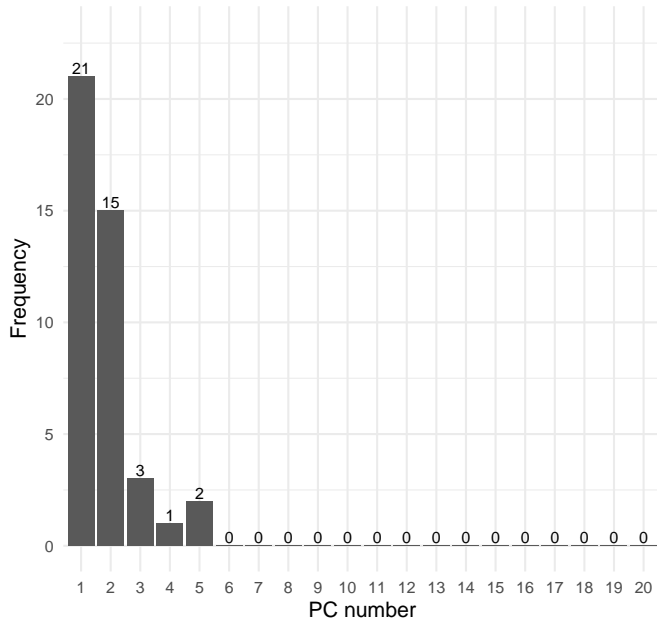

PC distribution in 22-element RAVs

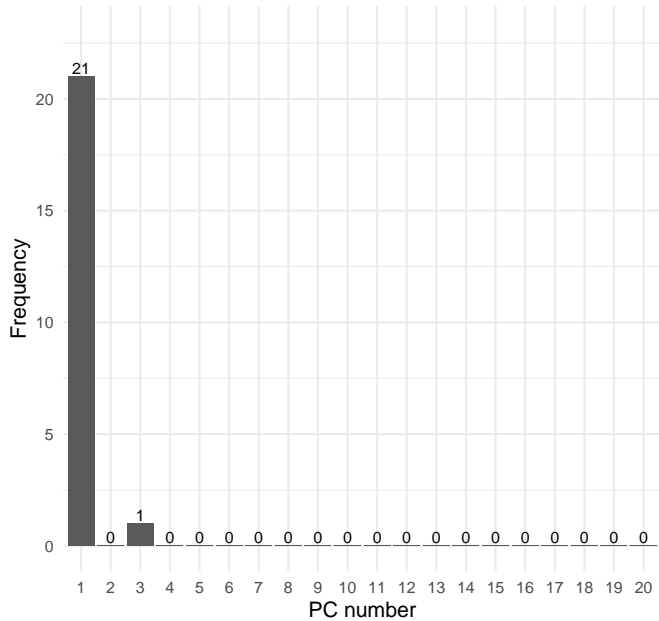

# PC distribution in 24-element RAVs

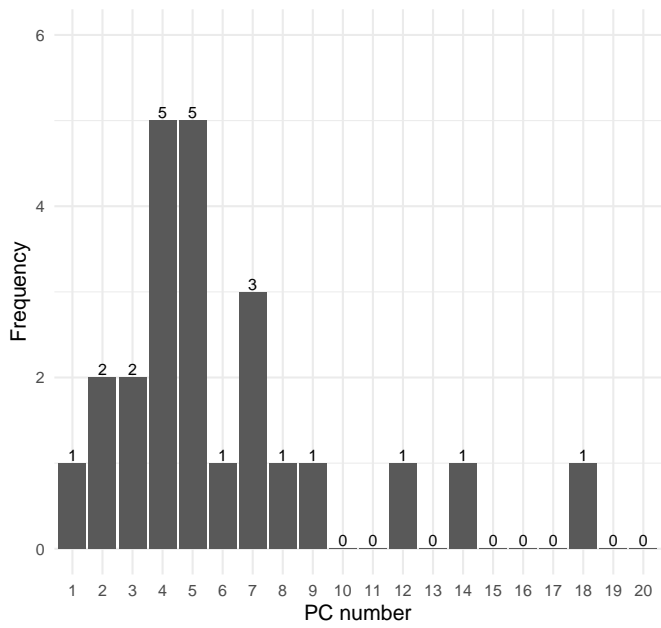

Supplement: 41467_2022_31411_MOESM6_ESM.pdf [file 41467_2022_31411_MOESM6_ESM.pdf]
